# Supplementary material for: Prevention of Cardiovascular Disease and Cancer Mortality by Achieving Healthy Dietary Goals for the Swedish Population: A Macro-Simulation Modelling Study
Source: PubMed Central journal article supplement (PMC6427376; doi:10.3390/ijerph16050890), 2019-03-12
Supplement: ijerph-16-00890-s001.pdf [file ijerph-16-00890-s001.pdf]

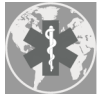

Supplementary materials 1

Table S1: Age-group and sex-specific mean (standard deviation) dietary intake incorporated in the PRIME model\*

| Dietary components   | Men (n=792)    |                |                |                | Women (n=1005) |                |                |                |
|----------------------|----------------|----------------|----------------|----------------|----------------|----------------|----------------|----------------|
|                      | 18-30<br>(132) | 31-44<br>(183) | 45-64<br>(308) | 65-80<br>(169) | 18-30<br>(202) | 31-44<br>(247) | 45-64<br>(358) | 65-80<br>(198) |
| Energy (kcal/day)    | 2246<br>(830)  | 2343<br>(573)  | 2254<br>(674)  | 2083<br>(550)  | 1819<br>(538)  | 1820<br>(517)  | 1755<br>(510)  | 1703<br>(432)  |
| Vegetables (gm/day)  | 142 (98)       | 174 (89)       | 176<br>(114)   | 169<br>(100)   | 162 (96)       | 189 (95)       | 192<br>(104)   | 178 (90)       |
| Fruits (gm/day)      | 67 (88)        | 73 (87)        | 117<br>(124)   | 149<br>(110)   | 112 (95)       | 135<br>(104)   | 155<br>(111)   | 182<br>(107)   |
| Fibre (gm/day)       | 18.6<br>(8.5)  | 21.3<br>(7.9)  | 21.8<br>(8.0)  | 22.5<br>(7.6)  | 17.3<br>(6.5)  | 18.5<br>(7.3)  | 19.3<br>(7.0)  | 20.0<br>(6.5)  |
| Salt (gm/day)        | 9.12<br>(3.47) | 9.55<br>(2.56) | 9.09<br>(2.91) | 8.03<br>(2.16) | 6.92<br>(2.06) | 7.19<br>(2.18) | 6.89<br>(1.93) | 6.36<br>(1.85) |
| Fat (%E)             | 33.9<br>(6.7)  | 34.6<br>(6.4)  | 33.8<br>(6.5)  | 33.6<br>(6.3)  | 34.6<br>(5.7)  | 34.7<br>(5.6)  | 34.7<br>(7.3)  | 33.2<br>(5.5)  |
| Saturated fat (%E)   | 13.2<br>(3.4)  | 13.2<br>(3.2)  | 13.0<br>(3.2)  | 12.8<br>(3.2)  | 13.1<br>(2.8)  | 13.3<br>(3.1)  | 13.2<br>(3.7)  | 12.8<br>(2.9)  |
| MUFA (%E)            | 12.8<br>(2.8)  | 13.1<br>(2.8)  | 12.7<br>(2.8)  | 12.5<br>(2.5)  | 13.1<br>(2.7)  | 13.0<br>(2.5)  | 12.9<br>(3.1)  | 12.3<br>(2.5)  |
| PUFA (%E)            | 5.2 (1.9)      | 5.6 (2.0)      | 5.4 (1.8)      | 5.6 (2.2)      | 5.8 (2.1)      | 5.6 (1.9)      | 5.8 (2.0)      | 5.5 (1.7)      |
| Cholesterol (mg/day) | 314<br>(172)   | 319<br>(139)   | 322<br>(141)   | 321<br>(138)   | 245<br>(121)   | 257<br>(113)   | 274<br>(129)   | 269<br>(123)   |

\*Obtained from “Riksmaten-vuxna 2010-11”

Abbreviations: %E, percentage of total energy; MUFA, Monounsaturated fatty acids; PUFA, Polyunsaturated fatty acids
